# Supplementary material for: A flexible solid-state asymmetric supercapacitor device comprising cobalt hydroxide and biomass-derived porous carbon
Source: Royal Society of Chemistry journal article supplement (doi:10.1039/d4ra05106h), 2024-01-01
Supplement: d4ra05106h1.pdf [file d4ra05106h1.pdf]

## Supplementary Information

# **A Flexible Solid-State Asymmetric Supercapacitor Device Comprising Cobalt Hydroxide and Biomass-Derived Porous Carbon**

*Rajeshvari Samatbhai Karmur,<sup>a1</sup> Debika Gogoi,<sup>a1</sup> Manash R. Das,<sup>b,c</sup> Narendra Nath Ghosh<sup>a\*</sup>*

<sup>a</sup> Nano-materials Lab, Department of Chemistry, BITS-Pilani, Goa Campus, Zuarinagar,  
Goa-403726, India.

<sup>b</sup> Advanced Materials Group, Materials Sciences and Technology Division, CSIR-NEIST,  
Jorhat, Assam-785006, India.

<sup>c</sup> Academy of Scientific and Innovative Research (AcSIR), Ghaziabad 201002, India.

\*Corresponding author. Tel. /fax: +91 832 2580318/25570339.

\*E-mail address: naren70@yahoo.com (N. N. Ghosh)

Author's email addresses: [p20200051@goa.bits-pilani.ac.in](mailto:p20200051@goa.bits-pilani.ac.in) (Rajeshvari Samatbhai Karmur),

[p20180429@goa.bits-pilani.ac.in](mailto:p20180429@goa.bits-pilani.ac.in) (Debika Gogoi),

[mnsrhdas@yahoo.com](mailto:mnsrhdas@yahoo.com) (Manash R. Das)

<sup>1</sup> Rajeshvari Samatbhai Karmur and Debika Gogoi contributed equally to this paper.

## **S1. Synthesis of Materials**

**S1.1 Chemicals used.** Cobalt nitrate hexahydrate ( $\text{Co}(\text{NO}_3)_2 \cdot 6\text{H}_2\text{O}$ ), Urea, and tri-sodium citrate were purchased from Merck, India. Sulphuric acid ( $\text{H}_2\text{SO}_4$ ), Potassium Hydroxide (KOH), Methanol (HPLC grade), and ethanol were purchased from Fisher Scientific. Polyvinylidene difluoride (PVDF), acetylene black, N-methyl-2-pyrrolidinone (NMP), and polyvinyl alcohol (PVA) were purchased from Sigma-Aldrich. All the chemicals were used without further purification. Deionized water was used throughout the experiment.

**S2. Characterization and Instrumentation.** In this present work, the in-depth characterization of the synthesized materials were carried out by using the following characterization techniques: (i) X-ray diffraction (XRD) patterns were recorded using a powder X-ray diffractometer (Bruker D8 Advance) with  $\text{Cu K}\alpha$  ( $\lambda = 0.15405 \text{ nm}$ ) radiation at a scanning speed of  $3^\circ \text{ min}^{-1}$ , (ii) Fourier Transform Infrared spectra (FTIR) were recorded in KBr by using spectrophotometer (IR Affinity-1, Shimadzu, Japan), (iii) Raman spectra were recorded on a Horiba via Raman microscope with a 633 nm laser excitation, (iv) Field emission scanning electron microscopy (FESEM) images of samples were obtained using Quanta 250 FEG (FEI), (v) High-resolution transmission electron microscopy (HRTEM) images were obtained by JEM-2100, (vi) Energy dispersive X-ray spectra (EDS) of the synthesized material was recorded using an EDAX ELEMENT electron microscope, (vii) XPS measurements were carried out by using a Thermo-Scientific ESCALAB Xi<sup>+</sup> spectrometer having a monochromatic Al  $\text{K}\alpha$  X-ray source (1486.6 eV) and a spherical energy analyzer that operates in the CAE (constant analyzer energy) mode. IVIUMSTAT (10V/5A/8MHz) workstation was used to perform the electrochemical studies.

## **S3. Electrode preparation:**

To fabricate the working electrode, first, a viscous paste of 80 wt % active electrode material with 10 wt % poly(vinylidene fluoride) in N-methyl-2-pyrrolidinone and 10 wt % acetylene black was prepared, and then this paste was coated on the nickel foam with dimensions (1.5 cm  $\times$  1.5 cm) and dried at 80 °C for 24 h under vacuum to remove the residual solvent. Only one side of the Ni foam was coated in the case of the working electrode for the asymmetric cell.

## **S4. Equations used:**

The values of specific capacitance ( $C_s$ ) for the three-electrode cell and the two-electrode asymmetric cells were calculated by using the following equation:

$$C_s = \frac{i\Delta t}{m\Delta V} \quad (S1)$$

Where  $i$  represents the charge or discharge current in Ampere (A),  $\Delta t$  is the discharge time in seconds (s),  $m$  represents the mass of supercapacitive material in gram (g), and  $\Delta V$  is the applied potential window.

For the two-electrode asymmetric cell, the energy density (E), and the power density (P) were determined by using the following equations:

$$E = \int_{t_1}^{t_2} I V(t) dt \times \frac{1000}{3600} \quad (S2)$$

$$P = \frac{E}{\Delta t} \times 3600 \quad (S3)$$

The Coulombic efficiency ( $\eta$ ) was calculated from the equation given below:

$$\eta(\%) = t_d/t_c \times 100 \quad (S4)$$

where,  $t_d$  is the discharging time,  $t_c$  is the charging time.

### **S5. Fabrication of an asymmetric supercapacitor (ASC) device.**

The voltammetric charges (Q) were calculated based on the following equations:

$$Q = C_{\text{single}} \times \Delta V \times m \quad (S5)$$

where  $m$  is the mass of the electrode (g),  $\Delta V$  is the potential window (V), and  $C_{\text{single}}$  is the specific capacitance ( $F g^{-1}$ ) of each electrode measured in three-electrode setup (calculated from cyclic voltammograms at a scan rate of  $10 \text{ mV s}^{-1}$ ).

Considering the charge/mass ratio for both anode and cathode, balancing of charge was carried out by substituting above equation as:

$$\frac{q_+}{q_-} = \frac{m_+}{m_-} = \frac{C_{sp-} \times \Delta V_-}{C_{sp+} \times \Delta V_+} \quad (S6)$$

Where  $C_{sp^-}$  is the  $C_S$  value obtained for the anode material in the potential window  $\Delta V^-$ ,  $C_{sp^+}$  is the  $C_S$  value obtained for the cathode material in the potential window  $\Delta V^+$ .

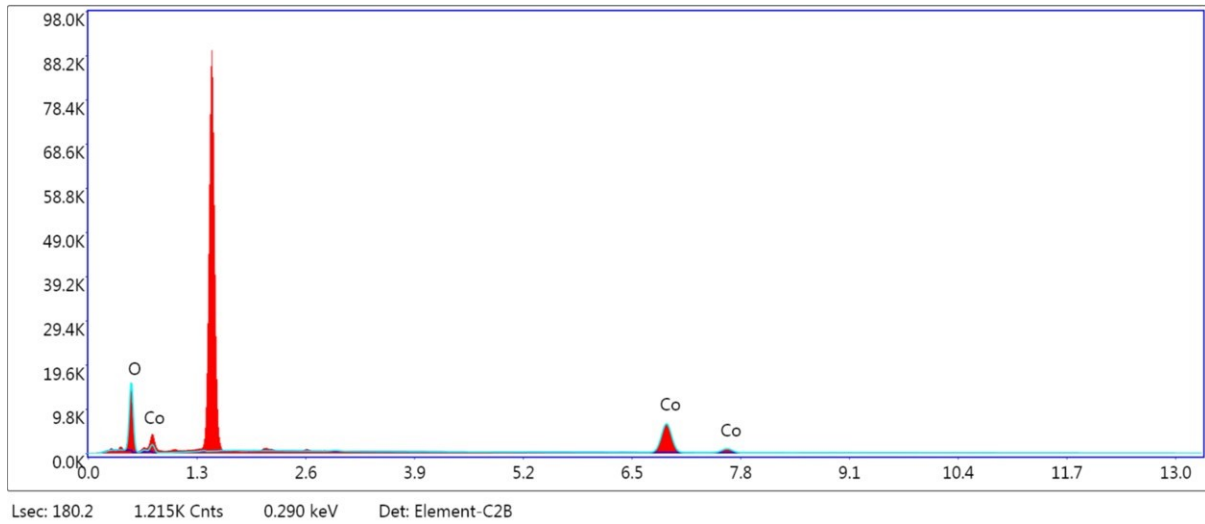

**Figure S1.** EDS survey spectra of  $\text{Co(OH)}_2$ .

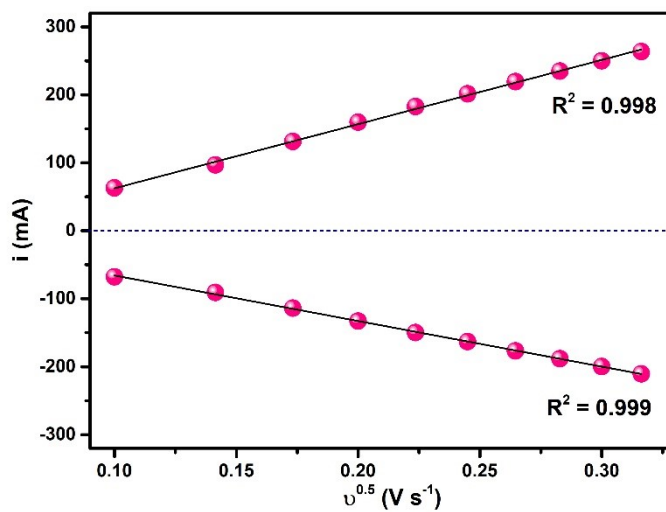

**Figure S2.** Randles-Sevcik plot of  $\text{Co(OH)}_2$ .

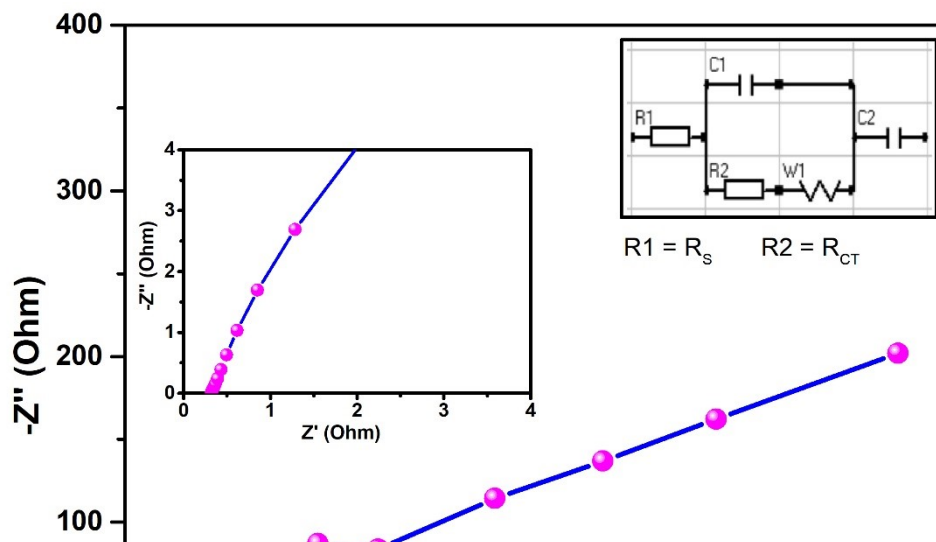

**Figure S3.** Nyquist plot of  $\text{Co}(\text{OH})_2$ .

---

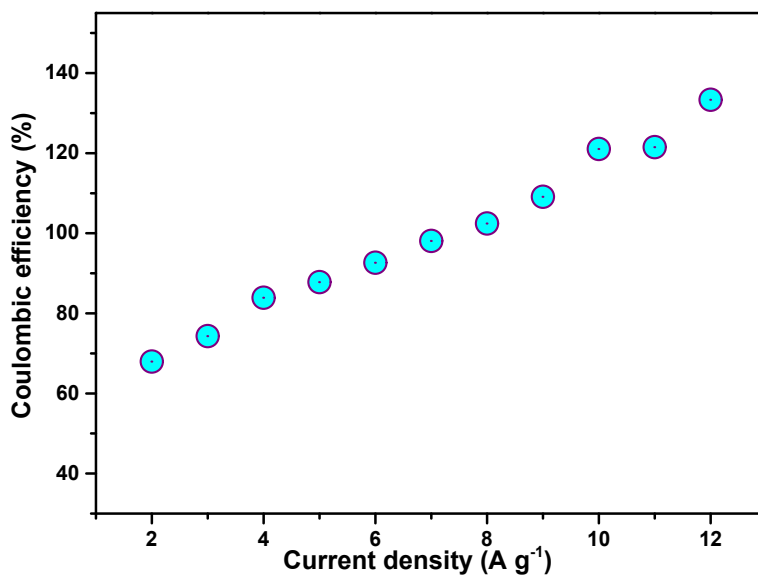

**Figure S4.** Coulombic efficiency (%) with the increased current densities of  $\text{Co}(\text{OH})_2$ //PC ASC device.

---

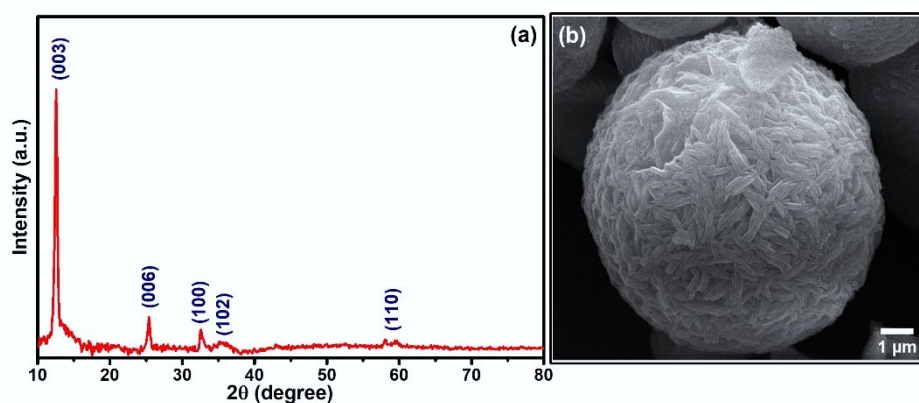

**Figure S5.** (a) XRD and (b) FESEM image of the  $\text{Co}(\text{OH})_2$  after cyclic stability test.

---
